# Supplementary material
Source: Springer Nature journal article supplement (https://www.springermedizin.de/resource/supplementary/12998_2008_85_MOESM2_ESM.pdf/9623522)
Supplement: MOESM2 [file 9623522]

**Suunniteltu haastattelu tietojen saamiseksi seuraavalla käynnillä (tai ensimmäisen hoidon jälkeen)**

Potilas No.: \_\_\_\_\_

Rastita / täytä sopivin vaihtoehto

**1. Kuinka kauan on ensimmäisestä hoidosta?**

- |                                   |                                      |                                      |
|-----------------------------------|--------------------------------------|--------------------------------------|
| <input type="checkbox"/> 1 päivää | <input type="checkbox"/> 2 päivää    | <input type="checkbox"/> 3 päivää    |
| <input type="checkbox"/> 4 päivää | <input type="checkbox"/> 5 päivää    | <input type="checkbox"/> 6 päivää    |
| <input type="checkbox"/> 7 päivää | <input type="checkbox"/> 8-14 päivää | <input type="checkbox"/> > 14 päivää |

**2. Alaselän/lantion hoitomuoto edellisellä hoidolla (useat vaihtoehdot mahdollisia)?**

- Selkärangan manipulaatiohoito (mukaan lukien Aktivaattori)  
 Drop  
 Pehmytkudosoidot  
 Kiilat  
 SOT  
 Muu, mikä? \_\_\_\_\_

**3. Kuinka voimakasta kipu on ollut edellisen vuorokauden aikana?**

- Ei kipua  
 Lievä  
 Kohtalainen  
 Kova  
 Sietämätön

**4. Oliko potilaalla epämiellyttäviä tunteuksia hoidon jälkeen?**

- A. Paikallinen kipu**  Kyllä  Ei  
Jos kyllä, kauanko se kesti?  Korkeintaan vrk  >vrk
- B. Uusi säteilykipu**  Kyllä  Ei  
Jos kyllä, kuinka voimakas?  Lievä  Kohtalainen  
 Kova  Sietämätön
- C. Väsymystä**  Kyllä  Ei  
Jos oli, kuinka kauan se kesti?  Korkeintaan vrk  >vrk
- D. Muuta** \_\_\_\_\_

**5. Jos potilaalla oli oireita seuraavissa toiminnoissa, ovatko nämä vähentyneet kivun lieventymisen vuoksi viimeisen vuorokauden aikana?**

A.  Sängyssä kääntyminen

Selvästi  Todennäköisesti  Muuttumaton  Huonompi  Asiaankuulumaton

B.  Nukkuminen

Selvästi  Todennäköisesti  Muuttumaton  Huonompi  Asiaankuulumaton

C.  Kenkien/sukkien pukeminen

Selvästi  Todennäköisesti  Muuttumaton  Huonompi  Asiaankuulumaton

D.  Kävely

Selvästi  Todennäköisesti  Muuttumaton  Huonompi  Asiaankuulumaton

E.  Istumasta nouseminen

Selvästi  Todennäköisesti  Muuttumaton  Huonompi  Asiaankuulumaton

F.  Yleisolotila

Selvästi  Todennäköisesti  Muuttumaton  Huonompi

---

(English translation)

**Planned interview for the return visit**

**1. Time elapsed since the first treatment?**

1 day/2days/3days/4days/5days/6days/7days/8-14days/more than 14 days

**2. Low back/pelvic treatment method at previous treatment session (you can choose more than one)?**

Spinal manipulative therapy (including activator)/Drop/Soft tissue work/Blocking or SOT/Other... which?

**3. The intensity of pain during the past 24 hours?**

No pain/Mild/Moderate/Severe/Unbearable

**4. Did the patient have any unpleasant reactions after the treatment? E.g.:**

- |                               |                                 |
|-------------------------------|---------------------------------|
| 1. Local pain                 | Yes/No                          |
| If yes, how long did it last? | No more than ..... days         |
| 2. New radiating pain?        | Yes/No                          |
| If yes, how severe            | Mild/Moderate/Severe/Unbearable |
| 3. Tiredness                  | Yes/No                          |
| If yes, how long did it last? | No more than ..... days.        |
| 4. Something else?            | .....                           |

**5. If the patient experienced symptoms in the following activities/functions, have these symptoms diminished because of the decreased pain during the past 24 hours?**

**Turning in bed**

Clearly relieved/Maybe relieved/Unchanged/Worse/Meaningless (not applicable)

**Sleeping**

Clearly relieved/Maybe relieved/Unchanged/Worse/ Meaningless

**Putting on shoes/socks**

Clearly relieved/Maybe relieved/Unchanged/Worse/ Meaningless

**Walking**

Clearly relieved/Maybe relieved/Unchanged/Worse/ Meaningless

**Standing up from sitting**

Clearly relieved/Maybe relieved/Unchanged/Worse/ Meaningless

**General feeling**

Clearly relieved/Maybe relieved/Unchanged/Worse/ Meaningless
